# Supplementary material for: Increase in the active ingredients of traditional Chinese medicine Isatis indigotica through iron nanoparticles supplementation versus carbon nanotubes: a comparative study
Source: Royal Society of Chemistry journal article supplement (doi:10.1039/d2en00488g), 2022-01-01
Supplement: d2en00488g1.pdf [file d2en00488g1.pdf]

# Iron nanoparticles increase the active ingredients of traditional Chinese Medicine *Isatis Indigotica* not carbon nanotubes: a comparative study

Pingfan Zhou <sup>a, 1</sup>, Binbin Long <sup>a, 1</sup>, Ruisi Wang <sup>a, 1</sup>, Yaqi Jiang <sup>a</sup>, Weichen Zhao <sup>a</sup>, Yuanbo Li <sup>a</sup>, Mingshu Li <sup>a</sup>, Zhiling Guo <sup>b</sup>, Peng Zhang <sup>b,c, \*</sup>, Yukui Rui <sup>a, \*</sup>, Iseult Lynch <sup>b</sup>

<sup>a</sup> Beijing Key Laboratory of Farmland Soil Pollution Prevention and Remediation, College of Resources and Environmental Sciences, China Agricultural University, Beijing 100193, China

<sup>b</sup> School of Geography, Earth and Environmental Sciences, University of Birmingham, Edgbaston, Birmingham, B15 2TT, UK

<sup>c</sup> Department of Environmental Science and Engineering, University of Science and Technology of China, Hefei, 230026, China

<sup>1</sup> The three authors contributed equally to the manuscript.

**\* Corresponding author information:**

Email: ruiyukui@163.com

Email:

p.zhang.1@bham.ac.uk

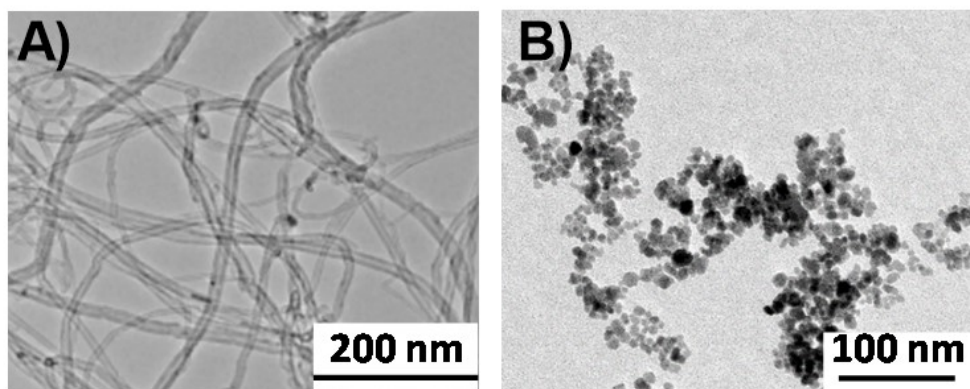

**Figure S1.** TEM images of MWCNTs (A) and Fe<sub>2</sub>O<sub>3</sub> (B) NPs. The diameter Fe<sub>2</sub>O<sub>3</sub> NPs are  $29.4 \pm 2.6$  nm.

**Table S1. Hydrodynamic size and zeta potential measurements of nanomaterials**

| Parameter           | MWCNTs          | Fe <sub>2</sub> O <sub>3</sub> |
|---------------------|-----------------|--------------------------------|
| Zeta Potential (mV) | $10.4 \pm 0.3$  | $4.3 \pm 0.5$                  |
| DLS (nm)            | $50109 \pm 500$ | $407 \pm 9.6$                  |

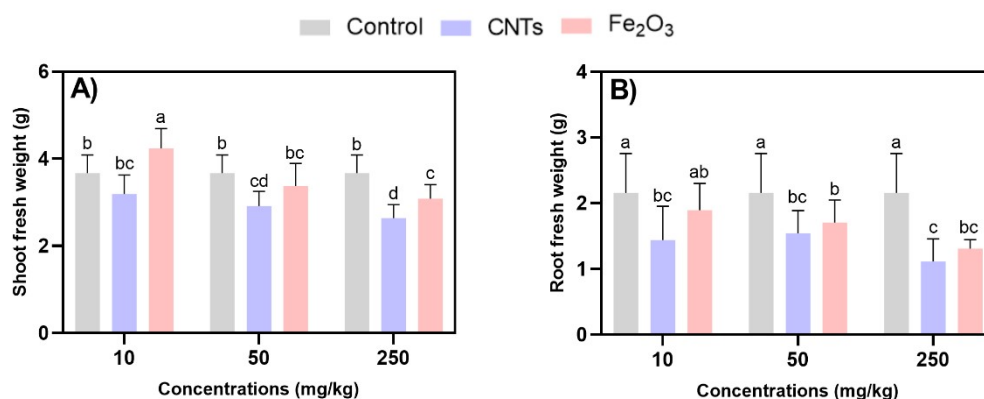

**Figure S2.** Shoot (A) and root (B) fresh weight of BLG exposed to nanoparticles for 60 days. Data represent mean  $\pm$  SD of 6 replicates. Different lowercase letters indicate significant differences at  $p < 0.05$ .

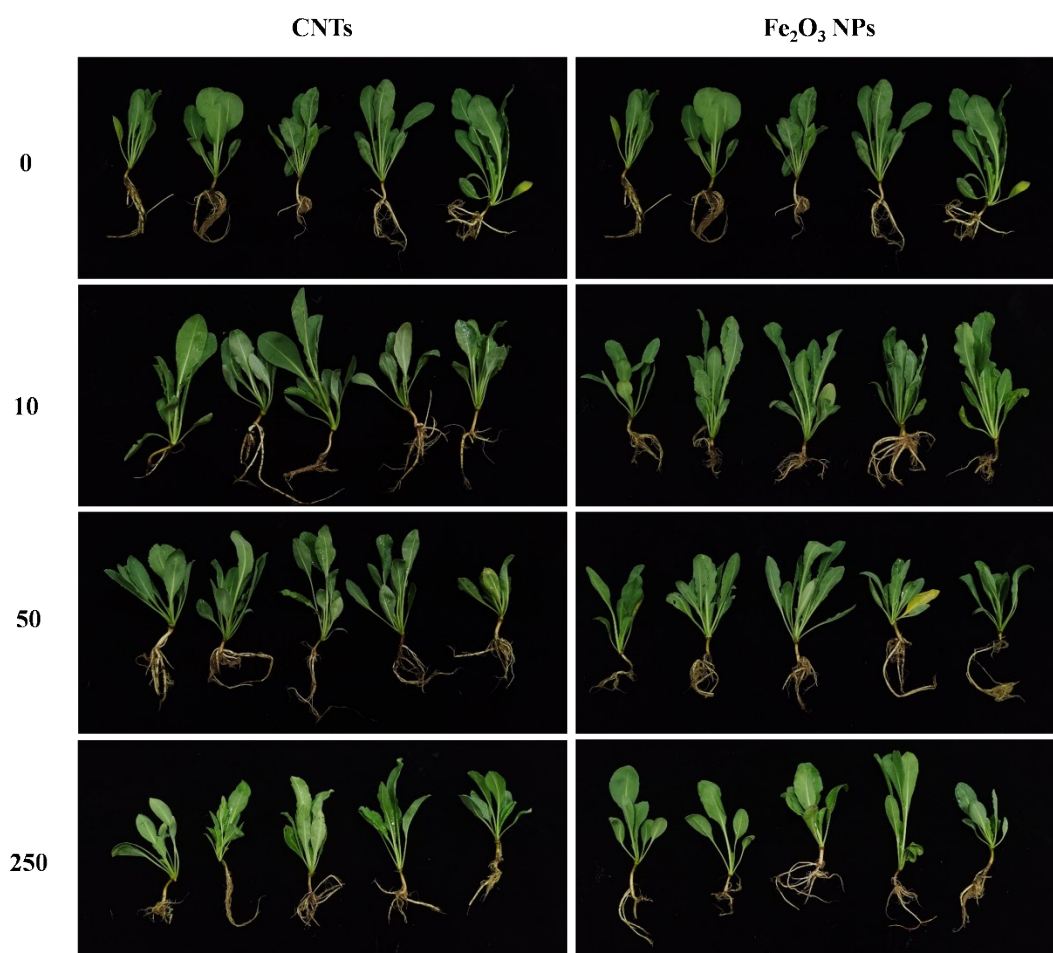

**Figure S3.** Images of BLG morphology. The left column is the CNTs group, and the right column is the Fe<sub>2</sub>O<sub>3</sub> group.

**Table S2.** Comparison of the effects of NMs on medicinal plants and crops

| Plant species                      | NMs type                           | Concentration | Variation of shoot biomass | Ref      |
|------------------------------------|------------------------------------|---------------|----------------------------|----------|
| <i>Isatis Indigotica</i>           | Fe <sub>2</sub> O <sub>3</sub> NPs | 10 mg/kg      | 14%                        | Current  |
|                                    | CNTs                               |               | -16%                       | Research |
| Peanut                             | Fe <sub>2</sub> O <sub>3</sub> NPs | 10 mg/kg      | 15.6%                      | [1]      |
| Tomato                             | CNTs                               | 10 mg/kg      | 9.93%                      | [2]      |
| <i>Phaseolus vulgaris</i> L.       | CNTs                               | 20 ug/L       | Fresh weight               | [3]      |
|                                    |                                    |               | 130%                       |          |
|                                    |                                    |               | Dry weight                 |          |
| <i>Dracocephalum kotschy</i> Boiss | Fe <sub>2</sub> O <sub>3</sub> NPs | 25 mg/L       | Fresh weight               | [4]      |
|                                    |                                    |               | 47.4%                      |          |
|                                    |                                    |               | Fresh weight               |          |
| Watermelon                         | Fe <sub>2</sub> O <sub>3</sub> NPs | 400 ppm       | 69.6%                      | [5]      |
|                                    |                                    |               | -6.7%                      |          |
| Non-transgenic rice                |                                    | 20 mg/L       | 1.7%                       |          |
| Transgenic rice                    | Fe <sub>2</sub> O <sub>3</sub> NPs | 20 mg/L       | -0.6%                      | [6]      |
|                                    |                                    | 200 mg/L      | -8.2%                      |          |
| Wheat                              | Fe <sub>2</sub> O <sub>3</sub> NPs | 50 mg/kg      | -12.2%                     | [7]      |
| Maize                              | CNTs                               | 100 mg/L      | Fresh weight               | [8]      |
|                                    |                                    |               | 22.2%                      |          |
|                                    |                                    |               | Dry weight                 |          |
|                                    |                                    |               | 32.6%                      |          |

## References:

- [1] Rui M., et al., Iron Oxide Nanoparticles as a Potential Iron Fertilizer for Peanut (*Arachis hypogaea*). *Front. Plant Sci*, 2016. 7:815.
- [2] Juliette T., et al., Carbon nanotubes affect early growth, flowering time and phytohormones

in tomato, *Chemosphere*, 2020, Volume 256,127042,

[3] Abdel-Aziz, H., et al., Effect of Multi-walled Carbon Nanotubes, Urea, and Peat Moss on Growth and Yield of Bean Plants Cultivated in Sandy Soil. *J Soil Sci Plant Nutr*, 2022 22, 1173–1187.

[4] Nourozi, E., et al., Iron oxide nanoparticles: a novel elicitor to enhance anticancer flavonoid production and gene expression in *Dracocephalum kotschy* hairy-root cultures. *J. Sci. Food Agric*, 2019, 99: 6418-6430.

[5] Li, J., et al., Influence of  $\alpha$ - and  $\gamma$ -Fe<sub>2</sub>O<sub>3</sub> Nanoparticles on Watermelon (*Citrullus lanatus*) Physiology and Fruit Quality. *Water Air Soil Pollut*, 2020, 231, 143.

[6] Gui, X., et al., Response difference of transgenic and conventional rice (*Oryza sativa*) to nanoparticles ( $\gamma$ Fe<sub>2</sub>O<sub>3</sub>). *Environ Sci Pollut Res*, 2015, 22, 17716–17723.

[7] Wang, Y., et al., Effect of metal oxide nanoparticles on amino acids in wheat grains (*Triticum aestivum*) in a life cycle study, *Journal of Environmental Management*, 2019, Volume 241, Pages 319-327.

[8] Hu, Y., et al., Multi-Wall Carbon Nanotubes Promote the Growth of Maize (*Zea mays*) by Regulating Carbon and Nitrogen Metabolism in Leaves , *Journal of Agricultural and Food Chemistry*, 2021 69 (17), 4981-4991.

**Table S3.** Soil characteristics

| Index                                          | Mean Value |
|------------------------------------------------|------------|
| Soil property                                  | Silty loam |
| Dry unit weight ( $\text{g cm}^{-3}$ )         | 1.29       |
| pH                                             | 7.7        |
| Electrical conductivity ( $\text{dS M}^{-1}$ ) | 0.16       |
| Rapidly available N ( $\text{mg kg}^{-1}$ )    | 20.37      |
| Rapidly available P ( $\text{mg kg}^{-1}$ )    | 11.21      |
| Rapidly available K ( $\text{mg kg}^{-1}$ )    | 73.64      |
| Organic matter ( $\text{g kg}^{-1}$ )          | 11.31      |
| CEC ( $\text{mol kg}^{-1}$ )                   | 14.27      |
| $\text{CaCO}_3$ ( $\text{g kg}^{-1}$ )         | 43.19      |
| Rapidly available Fe ( $\text{mg kg}^{-1}$ )   | 22.91      |
| Rapidly available Mn ( $\text{mg kg}^{-1}$ )   | 12.77      |
| Rapidly available Cu ( $\text{mg kg}^{-1}$ )   | 3.17       |
| Rapidly available Ni ( $\text{mg kg}^{-1}$ )   | 2.24       |

**Table S4.** Limit of detection, precision and recovery data for ICP-MS for the selected elements. CRM indicates certified reference material

| Elements | List of detection ( $\mu\text{g/L}$ ) | Spiking recovery (%) | Recovery from CRM (%) | Correlation coefficient ( $R^2$ ) | Correlation variance (%) |
|----------|---------------------------------------|----------------------|-----------------------|-----------------------------------|--------------------------|
| Ca       | 0.080                                 | 98.2                 | 98.3                  | 0.9999                            | 3.91                     |
| Cu       | 0.099                                 | 98.1                 | 101.2                 | 0.9998                            | 1.72                     |
| Fe       | 0.064                                 | 101.6                | 101.7                 | 0.9999                            | 2.31                     |
| K        | 0.103                                 | 98.3                 | 97.9                  | 0.9999                            | 2.71                     |
| Mg       | 0.114                                 | 101.2                | 99.3                  | 0.9999                            | 2.23                     |
| Mn       | 0.063                                 | 103.0                | 102.1                 | 0.9997                            | 2.45                     |
| Na       | 0.099                                 | 98.1                 | 101.2                 | 0.9998                            | 1.72                     |
| Zn       | 0.134                                 | 97.9                 | 98.1                  | 0.9998                            | 1.76                     |
| P        | 0.182                                 | 97.8                 | 97.6                  | 0.9997                            | 2.89                     |
